# Supplementary material for: libxtc: an efficient library for reading XTC-compressed MD trajectory data
Source: PubMed Central journal article supplement (PMC8017739; doi:10.1186/s13104-021-05536-5), 2021-04-01
Supplement: 13104_2021_5536_MOESM1_ESM.pdf [file 13104_2021_5536_MOESM1_ESM.pdf]

libxtc: An efficient library for reading XTC-compressed MD trajectory data.

Nikolay A. Krylov, Roman G. Efremov

---

Algorithm S1: Parallel xtc frame decompression algorithm.

---

```
tid - current thread index
nt - total thread count
natoms - number of atoms in the current frame
refcntr  $\leftarrow$  0
batch_size  $\leftarrow$  max(1, min(512,  $\frac{natoms}{5 \cdot nt}$ ))
while has more data do
  skip  $\leftarrow$   $\left(\frac{refcntr}{batch\_size} + tid\right) \bmod nt$ 
  refcntr  $\leftarrow$  refcntr + 1
  if skip  $\neq$  0 then
    skip coordinate bits
  else
    unpack coordinate bits
  end if
  rf  $\leftarrow$  extract rle flag
  if rf  $\neq$  0 then
    run  $\leftarrow$  extract run length
    if run  $\geq$  0 then
      if skip  $\neq$  0 then
        skip rle bits
      else
        unpack rle bits
      end if
    end if
  end if
end if
end while
```

---

Table S1: Size and composition of molecular systems used for testing.

| System type | Size   | Components                                                                                                                                                                                                                                                                                                      | Description                                                                                      |
|-------------|--------|-----------------------------------------------------------------------------------------------------------------------------------------------------------------------------------------------------------------------------------------------------------------------------------------------------------------|--------------------------------------------------------------------------------------------------|
| Small       | 20138  | 1 protein and 6649 water molecules                                                                                                                                                                                                                                                                              | 19-residue peptide in a water box                                                                |
| Medium      | 118812 | 288 dioleoylphosphatidylcholine (DOPC) molecules (54 atoms each) and 34420 water molecules                                                                                                                                                                                                                      | Hydrated lipid bilayer                                                                           |
| Big         | 210566 | 4 protein chains (4859 atoms each), 257 palmitoyloleoylphosphatidylcholine (POPC) molecules (134 atoms each), 119 palmitoyloleoylphosphatidylethanolamine (POPE) molecules (125 atoms each), 150 cholesterol molecules (74 atoms each), 43558 water molecules<br>1 Ca <sup>2+</sup> and 42 Cl <sup>-</sup> ions | Tetrameric integral membrane protein (receptor TRPV1) in three-component hydrated lipid membrane |

Table S2: Hardware and software components used for testing.

|                  | Configuration 1                     | Configuration 2                                    |
|------------------|-------------------------------------|----------------------------------------------------|
| CPU              | Intel Xeon CPU E5-2667 v2           | AMD Ryzen 7 3700X                                  |
| Memory           | DDR4 1866 MHz                       | DDR4 3200 MHz                                      |
| Chipset          | Intel C602J                         | AMD X470                                           |
| Storage          | HDD: HGST HUS726040ALE614, SATA III | SDD: Samsung 970 EVO Plus 500GB, M.2, PCI-E 3.0 4x |
| Operating System | Fedora Core 30                      | Gentoo                                             |
| Compiler         | gcc 9.2.1                           | gcc 9.3.0                                          |

Table S3: Performance of data processing and storage requirements for various molecular dynamics (MD) trajectory file formats and libraries libxtc, xdrfile, tng in the single-threaded mode.

| System type | Data processing speed <sup>a</sup> |         |          | Required storage <sup>b</sup> |             |
|-------------|------------------------------------|---------|----------|-------------------------------|-------------|
|             | libxtc <sup>c</sup>                | xdrfile | tng      | xtc                           | tng         |
| Small       | 1711±8                             | 1110±20 | 2460±130 | 71.2 (3.62)                   | 71.9 (3.65) |
| Medium      | 327±0.5                            | 185±3   | 450±13   | 431 (3.72)                    | 575 (4.96)  |
| Big         | 187±1                              | 105±2   | 260±7    | 762 (3.71)                    | 1015 (4.94) |

a) The values are given in MD frames per second (fps). 1000 frames of MD production run with a recording interval of more than 10 ps were used to estimate fps.

b) Average disk space required per single MD trajectory frame in kilobytes for the XTC and TNG formats (in brackets - data in bytes per atom).

c) This work.

Table S4: Performance of data processing on the second hardware configuration in the single-threaded mode. Other details are identical to the ones of Table S3.

| System type | Data processing speed |         |          |
|-------------|-----------------------|---------|----------|
|             | libxtc                | xdrfile | tng      |
| Small       | 4040±6                | 1540±10 | 6300±100 |
| Medium      | 697±1                 | 256±2   | 4540±70  |
| Big         | 402±0.5               | 143±3   | 930±10   |

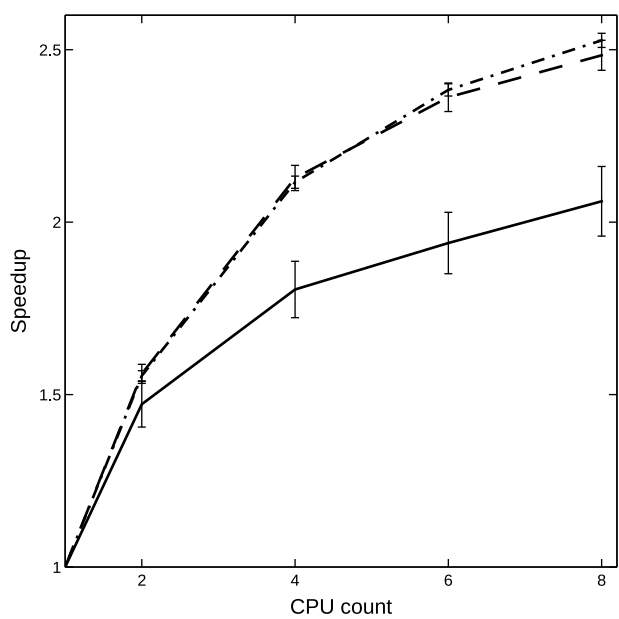

Figure S1: CPU-dependent acceleration of xtc frame reading for small (solid), medium (dash), and large (dash-dot) test systems. X axis is the number of used CPUs, Y axis is the speedup (coefficient of acceleration). Value deviations shown as vertical bars.

## Abbreviations

**CPU:** Central processing unit

**fps:** Frames per second

**MD:** Molecular dynamics

**MHz:** Megahertz

**rl:** Run-length encoding
